# Supplementary material for: Factors Influencing COVID-19 Vaccine Hesitancy among Patients with Serious Chronic Illnesses during the Initial Australian Vaccine Rollout: A Multi-Centre Qualitative Analysis Using the Health Belief Model
Source: MDPI journal article supplement (doi:10.3390/vaccines11020239), 2023-01-20
Supplement: s1 [file s1]

## **Supplementary materials**

These supplementary materials have been provided by the authors to give readers additional information about their work.

### **List of CANVACCS, DIABVACCS, and MSVACCS investigators**

#### **Monash Health, Victoria**

*CANVACCS*: Dr. Veronica Lopez Aedo, Dr. Elizabeth Ahern, Dr. Muhammad Alamgeer, Dr. Nathan Bain, Dr. Amy Body, A/Prof. Peter Briggs, Dr. Daphne Day, Dr. Sophia Frentzas, Dr. Lisa Grech, A/Prof. Marion Harris, Dr. Gwo-Yaw Ho, Dr. Caroline Lum, Dr. Vi Luong, Dr. Amelia McCartney, Dr. Cameron McLaren, Dr. Mike Nguyen, Prof. Stephen Opat, A/Prof. David Pook, Prof. Eva Segelov, A/Prof. Andrew Strickland, Dr. Avraham Travers, Dr. Kate Webber, Dr. Michelle White, Dr. Walid Zwikey.

*DIABVACCS*: Prof. Barbora de Courten, A/Prof. Jennifer Wong.

*MSVACCS*: Ms Michelle Allan, A/Prof. Ernest Butler.

#### **Bendigo Health, Victoria**

*CANVACCS*: Dr. Sam Harris.

*DIABVACCS*: Dr. Frank Gao, Dr. Amy Harding, A/Prof. Mark Savage.

#### **Latrobe Regional Hospital, Victoria**

*CANVACCS*: Dr. Hieu Chau.

#### **Sunshine Coast Hospital and Health Service, Queensland**

*CANVACCS*: A/Prof. Bryan Chan.

*DIABVACCS*: Dr. Brett Sillars.

*MSVACCS*: Dr. Joshua Barton, Dr. Antony Winkel.

#### **Icon Cancer Centre Hobart, Tasmania**

*CANVACCS*: A/Prof. Louise Nott.

#### **Central Coast Haematology, New South Wales**

*CANVACCS*: Dr. Richard Blennerhassett, Dr. Cecily Forsyth, Ms. Jacqueline Jagger.

#### **St Vincent's Hospital Sydney, New South Wales**

*CANVACCS*: A/Prof. Nada Hamad.

#### **Dr David Hoffman, New South Wales**

*DIABVACCS*: Dr. David Hoffman.

#### **Border Medical Oncology Research Unit, New South Wales**

*CANVACCS*: A/Prof. Craig Underhill.

**Table S1.** Clinical characteristics of participants who provided free-text comments, by underlying diagnosis (n = 1604).

| <b>Characteristic</b>                                   | <b>Cancer<br/>n = 1248<br/>n, (%)</b> | <b>Diabetes<br/>n = 244<br/>n, (%)</b> | <b>MS<br/>n = 112<br/>n, (%)</b> |
|---------------------------------------------------------|---------------------------------------|----------------------------------------|----------------------------------|
| <b>Cancer type</b>                                      |                                       |                                        |                                  |
| Breast                                                  | 355 (28.4)                            |                                        |                                  |
| Gastrointestinal                                        | 143 (11.5)                            |                                        |                                  |
| Blood                                                   | 354 (28.4)                            |                                        |                                  |
| Genitourinary                                           | 147 (11.8)                            |                                        |                                  |
| Lung                                                    | 87 (7.0)                              |                                        |                                  |
| Gynaecological                                          | 47 (3.8)                              |                                        |                                  |
| Skin                                                    | 56 (4.5)                              |                                        |                                  |
| Head and neck                                           | 32 (2.6)                              |                                        |                                  |
| Brain                                                   | 17 (1.4)                              |                                        |                                  |
| Other                                                   | 10 (0.8)                              |                                        |                                  |
| <b>Cancer stage<sup>a</sup></b>                         |                                       |                                        |                                  |
| Localised                                               | 524 (58.7)                            |                                        |                                  |
| Metastatic                                              | 333 (37.3)                            |                                        |                                  |
| Don't Know/Other                                        | 36 (4.0)                              |                                        |                                  |
| <b>Time since diagnosis</b>                             |                                       |                                        |                                  |
| <6 months                                               | 149 (11.9)                            |                                        |                                  |
| 6 – 24 months                                           | 390 (31.3)                            |                                        |                                  |
| 2 – 5 years                                             | 386 (30.9)                            |                                        |                                  |
| >5 years                                                | 323 (25.9)                            |                                        |                                  |
| <b>Currently on anti-cancer treatment</b>               |                                       |                                        |                                  |
| Yes                                                     | 636 (51.0)                            |                                        |                                  |
| No                                                      | 612 (49.0)                            |                                        |                                  |
| <b>Diabetes type</b>                                    |                                       |                                        |                                  |
| Type 1                                                  |                                       | 90 (36.9)                              |                                  |
| Type 2                                                  |                                       | 145 (59.4)                             |                                  |
| Other/Don't know                                        |                                       | 9 (3.7)                                |                                  |
| <b>Time since diabetes diagnosis</b>                    |                                       |                                        |                                  |
| <1 year                                                 |                                       | 9 (3.7)                                |                                  |
| 1 – 5 years                                             |                                       | 30 (12.3)                              |                                  |
| 5.1 – 10 years                                          |                                       | 45 (18.4)                              |                                  |
| >10 years                                               |                                       | 160 (65.6)                             |                                  |
| <b>Most recent HbA1c within the past year</b>           |                                       |                                        |                                  |
| <7%                                                     |                                       | 40 (16.5)                              |                                  |
| 7% – 8.5%                                               |                                       | 110 (45.3)                             |                                  |
| 8.6 – 10%                                               |                                       | 48 (19.8)                              |                                  |
| >10%                                                    |                                       | 15 (6.2)                               |                                  |
| Don't know                                              |                                       | 30 (12.3)                              |                                  |
| <b>Current diabetes treatment</b>                       |                                       |                                        |                                  |
| Insulin                                                 |                                       | 90 (36.9)                              |                                  |
| Tablets                                                 |                                       | 40 (16.4)                              |                                  |
| Injectables (not insulin)                               |                                       | 4 (1.6)                                |                                  |
| Diet only                                               |                                       | 5 (2.0)                                |                                  |
| Combination of treatments/Other                         |                                       | 105 (43.0)                             |                                  |
| <b>Management of diabetes in the past month:</b>        |                                       |                                        |                                  |
| Excellent                                               |                                       | 25 (10.3)                              |                                  |
| Very good                                               |                                       | 62 (25.5)                              |                                  |
| Good                                                    |                                       | 80 (32.9)                              |                                  |
| Fair                                                    |                                       | 54 (22.2)                              |                                  |
| Poor                                                    |                                       | 22 (9.1)                               |                                  |
| <b>Diabetes affect daily activities in last 4 weeks</b> |                                       |                                        |                                  |
| All of the time                                         |                                       | 20 (8.2)                               |                                  |

|                                                                          |           |
|--------------------------------------------------------------------------|-----------|
| Most of the time                                                         | 29 (11.9) |
| Some of the time                                                         | 66 (27.2) |
| Not very often                                                           | 64 (26.3) |
| Not at all                                                               | 64 (26.3) |
| <b>Multiple sclerosis (MS) type</b>                                      |           |
| Relapsing-remitting MS (RRMS)                                            | 87 (77.7) |
| Primary progressive MS (PPMS)                                            | 8 (7.1)   |
| Secondary progressive MS (SPMS)                                          | 10 (8.9)  |
| Other/Don't know                                                         | 7 (6.3)   |
| <b>Time since MS diagnosis</b>                                           |           |
| <1 year                                                                  | 3 (2.7)   |
| 1 – 5 years                                                              | 37 (33.0) |
| 5.1 – 10 years                                                           | 23 (20.5) |
| >10 years                                                                | 49 (43.8) |
| <b>Current MS treatment</b>                                              |           |
| Tablets                                                                  | 37 (33.0) |
| Injectables                                                              | 11 (9.8)  |
| Intravenous                                                              | 42 (37.5) |
| No specific treatment/Other                                              | 22 (19.6) |
| <b>MS control over past 6 months</b>                                     |           |
| Yes                                                                      | 88 (78.6) |
| No                                                                       | 13 (11.6) |
| Don't know                                                               | 11 (9.8)  |
| <b>No. of times missed disease modifying therapies in the past month</b> |           |
| All of the time                                                          | 4 (3.6)   |
| Most of the time                                                         | 0 (0.0)   |
| Some of the time                                                         | 3 (2.7)   |
| Occasionally                                                             | 13 (11.8) |
| Never                                                                    | 90 (81.8) |
| <b>MS affect daily activities in last 4 weeks</b>                        |           |
| All of the time                                                          | 14 (12.5) |
| Most of the time                                                         | 12 (10.7) |
| Some of the time                                                         | 44 (39.3) |
| Not very often                                                           | 20 (17.9) |
| Not at all                                                               | 22 (19.6) |

<sup>a</sup> There was also 'Not applicable/blood cancer' (n = 355). Abbreviations: MS, multiple sclerosis; HbA1c, Haemoglobin A1C.

**Table S2.** Chi-squared analyses for comparison of characteristics in participants with cancer, by commenter status (n = 3560).

|                       | <b>Did not comment<br/>(n = 2312)<br/>n, (%)</b> | <b>Commented<br/>(n = 1248)<br/>n, (%)</b> | <b>X<sup>2</sup> p-value<sup>a</sup></b> | <b>Cramer's V</b> |
|-----------------------|--------------------------------------------------|--------------------------------------------|------------------------------------------|-------------------|
| <b>Gender</b>         |                                                  |                                            | 0.002                                    | 0.05*             |
| Male                  | 1075 (67.8)                                      | 511 (32.2)                                 |                                          |                   |
| <i>Adj. residuals</i> | 3.2                                              | -3.2                                       |                                          |                   |
| Female                | 1227 (62.7)                                      | 730 (37.3)                                 |                                          |                   |
| <i>Adj. residuals</i> | -3.2                                             | 3.2                                        |                                          |                   |
| <b>Age</b>            |                                                  |                                            | 0.06                                     | 0.04              |
| 18 – 49               | 335 (65.7)                                       | 175 (34.3)                                 |                                          |                   |
| <i>Adj. residuals</i> | 0.4                                              | -0.4                                       |                                          |                   |
| 50 – 69               | 1177 (63.1)                                      | 687 (36.9)                                 |                                          |                   |
| <i>Adj. residuals</i> | -2.3                                             | 2.3                                        |                                          |                   |
| ≥70                   | 796 (67.3)                                       | 386 (32.7)                                 |                                          |                   |
| <i>Adj. residuals</i> | 2.2                                              | -2.2                                       |                                          |                   |

|                                                                  |             |             |        |        |
|------------------------------------------------------------------|-------------|-------------|--------|--------|
| <b>Highest level of education</b>                                |             |             | <0.001 | 0.10   |
| No formal / Primary school                                       | 63 (70.0)   | 27 (30.0)   |        |        |
| <i>Adj. residuals</i>                                            | 1.0         | 1.0         |        |        |
| Secondary school                                                 | 827 (70.9)  | 340 (29.1)  |        |        |
| <i>Adj. residuals</i>                                            | 5.2         | -5.2        |        |        |
| Vocational/Trade                                                 | 576 (64.3)  | 320 (35.7)  |        |        |
| <i>Adj. residuals</i>                                            | -0.4        | 0.4         |        |        |
| University                                                       | 837 (60.0)  | 559 (40.0)  |        |        |
| <i>Adj. residuals</i>                                            | -5.0        | 5.0         |        |        |
| <b>Annual household income (AUD)</b>                             |             |             | 0.40   | 0.03   |
| <50K                                                             | 750 (64.9)  | 405 (35.1)  |        |        |
| <i>Adj. residuals</i>                                            | 0.0         | 0.0         |        |        |
| 50-100K                                                          | 544 (63.7)  | 310 (36.3)  |        |        |
| <i>Adj. residuals</i>                                            | -0.9        | 0.9         |        |        |
| 100K-150K                                                        | 288 (62.3)  | 174 (37.7)  |        |        |
| <i>Adj. residuals</i>                                            | -1.3        | 1.3         |        |        |
| >150K                                                            | 311 (67.0)  | 153 (33.0)  |        |        |
| <i>Adj. residuals</i>                                            | 1.0         | -1.0        |        |        |
| Prefer not to say                                                | 419 (67.0)  | 206 (33.0)  |        |        |
| <i>Adj. residuals</i>                                            | 1.2         | -1.2        |        |        |
| <b>English as dominant language</b>                              |             |             | 0.10   | -0.03* |
| Yes                                                              | 2090 (64.5) | 1150 (35.5) |        |        |
| No                                                               | 221 (69.3)  | 98 (30.7)   |        |        |
| <b>Location</b>                                                  |             |             | 0.028  | 0.04*  |
| Metropolitan                                                     | 1582 (66.2) | 808 (33.8)  |        |        |
| <i>Adj. residuals</i>                                            | 2.2         | -2.2        |        |        |
| Regional                                                         | 730 (62.4)  | 440 (37.6)  |        |        |
| <i>Adj. residuals</i>                                            | -2.2        | 2.2         |        |        |
| <b>Vaccination status<sup>b</sup></b>                            |             |             | <0.001 | 0.16*  |
| Yes                                                              | 1978 (68.6) | 906 (31.4)  |        |        |
| <i>Adj. residuals</i>                                            | 9.5         | -9.5        |        |        |
| No                                                               | 332 (49.3)  | 342 (50.7)  |        |        |
| <i>Adj. residuals</i>                                            | -9.5        | 9.5         |        |        |
| <b>Vaccination intent<sup>c</sup></b>                            |             |             | <0.001 | 0.15   |
| Likely                                                           | 2161 (67.2) | 1056 (32.8) |        |        |
| <i>Adj. residuals</i>                                            | 8.6         | -8.6        |        |        |
| Unsure/Don't know                                                | 99 (49.3)   | 102 (50.7)  |        |        |
| <i>Adj. residuals</i>                                            | -4.8        | 4.8         |        |        |
| Unlikely                                                         | 51 (36.2)   | 90 (63.8)   |        |        |
| <i>Adj. residuals</i>                                            | -7.3        | 7.3         |        |        |
| <b>Belief about likelihood of COVID-19 infection<sup>d</sup></b> |             |             | 0.001  | 0.06   |
| Likely                                                           | 994 (62.9)  | 587 (37.1)  |        |        |
| <i>Adj. residuals</i>                                            | -2.3        | 2.3         |        |        |
| Unlikely                                                         | 877 (68.9)  | 396 (31.1)  |        |        |
| <i>Adj. residuals</i>                                            | 3.7         | -3.7        |        |        |
| Don't know                                                       | 441 (62.5)  | 265 (37.5)  |        |        |
| <i>Adj. residuals</i>                                            | -1.5        | 1.5         |        |        |
| <b>Cancer type</b>                                               |             |             | 0.001  | 0.09   |
| Breast                                                           | 631 (64.0)  | 355 (36.0)  |        |        |
| <i>Adj. residuals</i>                                            | -0.7        | 0.7         |        |        |
| Gastrointestinal                                                 | 350 (71.0)  | 143 (29.0)  |        |        |
| <i>Adj. residuals</i>                                            | 3.0         | -3.0        |        |        |
| Blood                                                            | 515 (59.3)  | 354 (40.7)  |        |        |
| <i>Adj. residuals</i>                                            | -4.0        | 4.0         |        |        |
| Genitourinary                                                    | 354 (70.7)  | 147 (29.3)  |        |        |
| <i>Adj. residuals</i>                                            | 2.9         | -2.9        |        |        |
| Lung                                                             | 161 (64.9)  | 87 (35.1)   |        |        |

|                                      |             |            |      |         |
|--------------------------------------|-------------|------------|------|---------|
| <i>Adj. residuals</i>                | 0.0         | 0.0        |      |         |
| Gynaecological                       | 87 (64.9)   | 47 (35.1)  |      |         |
| <i>Adj. residuals</i>                | 0.0         | 0.0        |      |         |
| Skin                                 | 95 (62.9)   | 56 (37.1)  |      |         |
| <i>Adj. residuals</i>                | -0.5        | 0.5        |      |         |
| Head and neck                        | 67 (67.7)   | 32 (32.3)  |      |         |
| <i>Adj. residuals</i>                | 0.6         | -0.6       |      |         |
| Brain                                | 29 (63.0)   | 17 (37.0)  |      |         |
| <i>Adj. residuals</i>                | -0.3        | 0.3        |      |         |
| Other                                | 23 (69.7)   | 10 (30.3)  |      |         |
| <i>Adj. residuals</i>                | 0.6         | -0.6       |      |         |
| <b>Cancer stage</b>                  |             |            | 0.49 | 0.01*   |
| Localised                            | 1069 (67.1) | 524 (32.9) |      |         |
| <i>Adj. residuals</i>                | 0.7         | -0.7       |      |         |
| Metastatic                           | 638 (65.7)  | 333 (34.3) |      |         |
| <i>Adj. residuals</i>                | -0.7        | 0.7        |      |         |
| <b>Time since cancer diagnosis</b>   |             |            | 0.61 | 0.02    |
| <6 months                            | 287 (65.8)  | 149 (34.2) |      |         |
| <i>Adj. residuals</i>                | 0.4         | -0.4       |      |         |
| 6-24 months                          | 758 (66.0)  | 390 (34.0) |      |         |
| <i>Adj. residuals</i>                | 0.9         | -0.9       |      |         |
| 2-5 years                            | 710 (64.8)  | 386 (35.2) |      |         |
| <i>Adj. residuals</i>                | -0.1        | 0.1        |      |         |
| >5 years                             | 557 (63.3)  | 323 (36.7) |      |         |
| <i>Adj. residuals</i>                | -1.2        | 1.2        |      |         |
| <b>Current anti-cancer treatment</b> |             |            |      |         |
| Yes                                  | 1172 (64.8) | 636 (35.2) | 0.88 | -0.003* |
| <i>Adj. residuals</i>                | -0.2        | 0.2        |      |         |
| No                                   | 1140 (65.1) | 612 (34.9) |      |         |
| <i>Adj. residuals</i>                | 0.2         | -0.2       |      |         |

\* Phi coefficient reported. Abbreviations: Adj. residuals, adjusted residuals; AUD, Australian Dollars; K, 1000. <sup>a</sup> Chi-square p-value. The following categories were not included in the chi-square analyses: Non-binary/prefer not to say (gender); other (highest level of education); don't know/other/not applicable (cancer stage).

<sup>b</sup> Vaccination status was defined as receiving at least one COVID-19 vaccine dose.

<sup>c</sup> Vaccination intent were categorised as: Likely, Have/definitely/probably; Unsure, May or may not/possibly/don't know; Unlikely, Probably not/definitely not.

<sup>d</sup> Belief about likelihood of contracting COVID-19 within the next 12 months were categorised as: Likely, Definitely/probably/possibly; Unlikely, Probably not/Definitely Not; Don't know, Don't know.

**Table S3.** Chi-squared analyses for comparison of characteristics in participants with diabetes, by commenter status (n = 842).

|                       | Did not comment<br>(n = 598)<br>n, (%) | Commented<br>(n = 244)<br>n, (%) | X <sup>2</sup> p-value <sup>a</sup> | Cramer's V |
|-----------------------|----------------------------------------|----------------------------------|-------------------------------------|------------|
| <b>Gender</b>         |                                        |                                  | 0.046                               | 0.07*      |
| Male                  | 337 (73.7)                             | 120 (26.3)                       |                                     |            |
| <i>Adj. residuals</i> | 2.1                                    | -2.1                             |                                     |            |
| Female                | 254 (67.2)                             | 124 (32.8)                       |                                     |            |
| <i>Adj. residuals</i> | -2.1                                   | 2.1                              |                                     |            |
| <b>Age</b>            |                                        |                                  | 0.09                                | 0.08       |
| 18 – 49               | 183 (72.9)                             | 68 (27.1)                        |                                     |            |
| <i>Adj. residuals</i> | 0.8                                    | -0.8                             |                                     |            |
| 50 – 69               | 310 (68.1)                             | 145 (31.9)                       |                                     |            |
| <i>Adj. residuals</i> | -2.0                                   | 2.0                              |                                     |            |
| ≥70                   | 105 (77.2)                             | 31 (22.8)                        |                                     |            |

|                                                                  |            |            |        |        |
|------------------------------------------------------------------|------------|------------|--------|--------|
| <i>Adj. residuals</i>                                            | 1.7        | -1.7       |        |        |
| <b>Highest level of education</b>                                |            |            | 0.16   | 0.08   |
| No formal/Primary school                                         | 27 (73.0)  | 10 (27.0)  |        |        |
| <i>Adj. residuals</i>                                            | 0.2        | -0.2       |        |        |
| Secondary school                                                 | 240 (75.2) | 79 (24.8)  |        |        |
| <i>Adj. residuals</i>                                            | 2.0        | -2.0       |        |        |
| Vocational/Trade                                                 | 162 (70.1) | 69 (29.9)  |        |        |
| <i>Adj. residuals</i>                                            | -0.4       | 0.4        |        |        |
| University                                                       | 169 (66.8) | 84 (33.2)  |        |        |
| <i>Adj. residuals</i>                                            | -1.8       | 1.8        |        |        |
| <b>Annual household income (AUD)</b>                             |            |            | 0.08   | 0.10   |
| <50K                                                             | 224 (69.3) | 99 (30.7)  |        |        |
| <i>Adj. residuals</i>                                            | -0.8       | 0.8        |        |        |
| 50-100K                                                          | 149 (68.7) | 68 (31.3)  |        |        |
| <i>Adj. residuals</i>                                            | -0.9       | 0.9        |        |        |
| 100K-150K                                                        | 69 (75.0)  | 23 (25.0)  |        |        |
| <i>Adj. residuals</i>                                            | 0.9        | -0.9       |        |        |
| >150K                                                            | 32 (61.5)  | 20 (38.5)  |        |        |
| <i>Adj. residuals</i>                                            | -1.6       | 1.6        |        |        |
| Prefer not to say                                                | 124 (78.5) | 34 (21.5)  |        |        |
| <i>Adj. residuals</i>                                            | 2.3        | -2.3       |        |        |
| <b>English as dominant language</b>                              |            |            | 0.23   | -0.05* |
| Yes                                                              | 474 (70.0) | 203 (30.0) |        |        |
| <i>Adj. residuals</i>                                            | -1.3       | 1.3        |        |        |
| No                                                               | 124 (75.2) | 41 (24.8)  |        |        |
| <i>Adj. residuals</i>                                            | 1.3        | -1.3       |        |        |
| <b>Location</b>                                                  |            |            | 0.52   | 0.03*  |
| Metropolitan                                                     | 434 (71.7) | 171 (28.3) |        |        |
| <i>Adj. residuals</i>                                            | 0.7        | -0.7       |        |        |
| Regional                                                         | 164 (69.2) | 73 (30.8)  |        |        |
| <i>Adj. residuals</i>                                            | -0.7       | 0.7        |        |        |
| <b>Vaccination status<sup>b</sup></b>                            |            |            | <0.001 | 0.21*  |
| Yes                                                              | 525 (75.4) | 171 (24.6) |        |        |
| <i>Adj. residuals</i>                                            | 6.2        | -6.2       |        |        |
| No                                                               | 73 (50.0)  | 73 (50.0)  |        |        |
| <i>Adj. residuals</i>                                            | -6.2       | 6.2        |        |        |
| <b>Vaccination intent<sup>c</sup></b>                            |            |            | <0.001 | 0.27   |
| Likely                                                           | 559 (75.3) | 183 (24.7) |        |        |
| <i>Adj. residuals</i>                                            | 7.5        | -7.5       |        |        |
| Unsure/Don't know                                                | 24 (46.2)  | 28 (53.8)  |        |        |
| <i>Adj. residuals</i>                                            | -4.1       | 4.1        |        |        |
| Unlikely                                                         | 15 (31.3)  | 33 (68.6)  |        |        |
| <i>Adj. residuals</i>                                            | -6.3       | 6.3        |        |        |
| <b>Belief about likelihood of COVID-19 infection<sup>d</sup></b> |            |            | 0.55   | 0.04   |
| Likely                                                           | 272 (69.6) | 119 (30.4) |        |        |
| <i>Adj. residuals</i>                                            | -0.9       | 0.9        |        |        |
| Unlikely                                                         | 187 (71.1) | 76 (28.9)  |        |        |
| <i>Adj. residuals</i>                                            | 0.0        | 0.0        |        |        |
| Don't know                                                       | 139 (73.9) | 49 (26.1)  |        |        |
| <i>Adj. residuals</i>                                            | 1.0        | -1.0       |        |        |
| <b>Diabetes type</b>                                             |            |            | 0.005  | -0.10* |
| Type 1                                                           | 162 (64.3) | 90 (35.7)  |        |        |
| <i>Adj. residuals</i>                                            | -2.8       | 2.8        |        |        |
| Type 2                                                           | 412 (74.0) | 145 (26.0) |        |        |
| <i>Adj. residuals</i>                                            | 2.8        | -2.8       |        |        |
| <b>Time since diabetes diagnosis</b>                             |            |            | 0.61   | 0.05   |
| <1 year                                                          | 28 (75.7)  | 9 (24.3)   |        |        |

|                                                                 |            |            |      |       |
|-----------------------------------------------------------------|------------|------------|------|-------|
| <i>Adj. residuals</i>                                           | 0.6        | -0.6       |      |       |
| 1 – 5 years                                                     | 76 (71.7)  | 30 (28.3)  |      |       |
| <i>Adj. residuals</i>                                           | 0.2        | -0.2       |      |       |
| 5.1 – 10 years                                                  | 129 (74.1) | 45 (25.9)  |      |       |
| <i>Adj. residuals</i>                                           | 1.0        | -1.0       |      |       |
| >10 years                                                       | 365 (69.5) | 160 (30.5) |      |       |
| <i>Adj. residuals</i>                                           | -1.2       | 1.2        |      |       |
| <b>Most recent Haemoglobin A1C (HbA1c) within the past year</b> |            |            | 0.03 | 0.11  |
| <7%                                                             | 99 (71.2)  | 40 (28.8)  |      |       |
| <i>Adj. residuals</i>                                           | 0.1        | -0.1       |      |       |
| 7% to 8.5%                                                      | 224 (67.1) | 110 (32.9) |      |       |
| <i>Adj. residuals</i>                                           | -2.0       | 2.0        |      |       |
| 8.6 to 10%                                                      | 100 (67.6) | 48 (32.4)  |      |       |
| <i>Adj. residuals</i>                                           | -1.0       | 1.0        |      |       |
| >10%                                                            | 52 (77.6)  | 15 (22.4)  |      |       |
| <i>Adj. residuals</i>                                           | 1.2        | -1.2       |      |       |
| Don't know                                                      | 120 (80.0) | 30 (20.0)  |      |       |
| <i>Adj. residuals</i>                                           | 2.7        | -2.7       |      |       |
| <b>Current diabetes treatment</b>                               |            |            |      |       |
| Yes                                                             | 587 (71.1) | 239 (28.9) | 0.79 | 0.01* |
| <i>Adj. residuals</i>                                           | 0.2        | -0.2       |      |       |
| No                                                              | 11 (68.8)  | 5 (31.3)   |      |       |
| <i>Adj. residuals</i>                                           | -0.2       | 0.2        |      |       |
| <b>Management of diabetes in the past month:</b>                |            |            | 0.03 | 0.11  |
| Excellent                                                       | 62 (71.3)  | 25 (28.7)  |      |       |
| <i>Adj. residuals</i>                                           | 0.0        | 0.0        |      |       |
| Very good                                                       | 175 (73.8) | 62 (26.2)  |      |       |
| <i>Adj. residuals</i>                                           | 1.1        | -1.1       |      |       |
| Good                                                            | 222 (73.5) | 80 (26.5)  |      |       |
| <i>Adj. residuals</i>                                           | 1.2        | -1.2       |      |       |
| Fair                                                            | 115 (68.0) | 54 (32.0)  |      |       |
| <i>Adj. residuals</i>                                           | -1.0       | 1.0        |      |       |
| Poor                                                            | 24 (52.2)  | 22 (47.8)  |      |       |
| <i>Adj. residuals</i>                                           | -2.9       | 2.9        |      |       |
| <b>Diabetes affect daily activities in last 4 weeks</b>         |            |            | 0.44 | 0.07  |
| All of the time                                                 | 32 (61.5)  | 20 (38.5)  |      |       |
| <i>Adj. residuals</i>                                           | -1.6       | 1.6        |      |       |
| Most of the time                                                | 63 (68.5)  | 29 (31.5)  |      |       |
| <i>Adj. residuals</i>                                           | -0.6       | 0.6        |      |       |
| Some of the time                                                | 156 (70.3) | 66 (29.7)  |      |       |
| <i>Adj. residuals</i>                                           | -0.3       | 0.3        |      |       |
| Not very often                                                  | 165 (72.1) | 64 (27.9)  |      |       |
| <i>Adj. residuals</i>                                           | 0.4        | -0.4       |      |       |
| Not at all                                                      | 182 (74.0) | 64 (26.0)  |      |       |
| <i>Adj. residuals</i>                                           | 1.2        | -1.2       |      |       |

\* Phi coefficient reported. Abbreviations: Adj. residuals, adjusted residuals; AUD, Australian Dollars; K, 1000; HbA1c, Haemoglobin A1C. <sup>a</sup>Chi-square p-value. The following categories were not included in the analyses: Non-binary/prefer not to say (gender); other (highest level of education); don't know/other (diabetes type). <sup>b</sup>Vaccination status was defined as receiving at least one COVID-19 vaccine dose. <sup>c</sup>Vaccination intent were categorised as: Likely, Have/definitely/probably; Unsure, May or may not/possibly/don't know; Unlikely, Probably not/definitely not. <sup>d</sup>Belief about likelihood of contracting COVID-19 within the next 12 months were categorised as: Likely, Definitely/probably/possibly; Unlikely, Probably not/Definitely Not; Don't know, Don't know.

**Table S4.** Chi-squared analyses for comparison of characteristics in participants with multiple sclerosis, by commenter status (n = 281).

|                                                                  | Did not comment<br>(n = 169)<br>n, (%) | Commented<br>(n = 112)<br>n, (%) | $\chi^2$ p-value <sup>a</sup> | Cramer's V |
|------------------------------------------------------------------|----------------------------------------|----------------------------------|-------------------------------|------------|
| <b>Gender</b>                                                    |                                        |                                  | 0.71                          | -0.02*     |
| Male                                                             | 38 (58.5)                              | 27 (41.5)                        |                               |            |
| <i>Adj. residuals</i>                                            | -0.4                                   | 0.4                              |                               |            |
| Female                                                           | 130 (61.0)                             | 83 (39.0)                        |                               |            |
| <i>Adj. residuals</i>                                            | 0.4                                    | -0.4                             |                               |            |
| <b>Age</b>                                                       |                                        |                                  | 0.60                          | 0.06       |
| 18 – 39                                                          | 47 (56.6)                              | 36 (43.4)                        |                               |            |
| <i>Adj. residuals</i>                                            | -0.8                                   | 0.8                              |                               |            |
| 40 – 59                                                          | 83 (60.1)                              | 55 (39.9)                        |                               |            |
| <i>Adj. residuals</i>                                            | 0.0                                    | 0.0                              |                               |            |
| ≥60                                                              | 39 (65.0)                              | 21 (35.0)                        |                               |            |
| <i>Adj. residuals</i>                                            | 0.9                                    | -0.9                             |                               |            |
| <b>Highest level of education</b>                                |                                        |                                  | 0.56                          | 0.06       |
| No formal/primary school/secondary school                        | 56 (61.5)                              | 35 (38.5)                        |                               |            |
| <i>Adj. residuals</i>                                            | 0.3                                    | -0.3                             |                               |            |
| Vocational/Trade                                                 | 48 (64.0)                              | 27 (36.0)                        |                               |            |
| <i>Adj. residuals</i>                                            | 0.8                                    | -0.8                             |                               |            |
| University                                                       | 65 (56.5)                              | 50 (43.5)                        |                               |            |
| <i>Adj. residuals</i>                                            | -1.0                                   | 1.0                              |                               |            |
| <b>Annual household income (AUD)</b>                             |                                        |                                  | 0.90                          | 0.06       |
| <50K                                                             | 46 (63.9)                              | 26 (36.1)                        |                               |            |
| <i>Adj. residuals</i>                                            | 0.8                                    | -0.8                             |                               |            |
| 50 – 100K                                                        | 43 (56.6)                              | 33 (43.4)                        |                               |            |
| <i>Adj. residuals</i>                                            | -0.7                                   | 0.7                              |                               |            |
| 100K – 150K                                                      | 25 (61.0)                              | 16 (39.0)                        |                               |            |
| <i>Adj. residuals</i>                                            | 0.1                                    | -0.1                             |                               |            |
| >150K                                                            | 25 (62.5)                              | 15 (37.5)                        |                               |            |
| <i>Adj. residuals</i>                                            | 0.3                                    | -0.3                             |                               |            |
| Prefer not to say                                                | 30 (57.7)                              | 22 (42.3)                        |                               |            |
| <i>Adj. residuals</i>                                            | -0.4                                   | 0.4                              |                               |            |
| <b>English as dominant language</b>                              |                                        |                                  | 0.40                          | 0.06*      |
| Yes                                                              | 157 (61.1)                             | 100 (38.9)                       |                               |            |
| <i>Adj. residuals</i>                                            | 1.1                                    | -1.1                             |                               |            |
| No                                                               | 12 (50.0)                              | 12 (50.0)                        |                               |            |
| <i>Adj. residuals</i>                                            | -1.1                                   | 1.1                              |                               |            |
| <b>Location</b>                                                  |                                        |                                  | 0.44                          | 0.05*      |
| Metropolitan                                                     | 146 (61.1)                             | 93 (83.9)                        |                               |            |
| <i>Adj. residuals</i>                                            | 0.8                                    | -0.8                             |                               |            |
| Regional                                                         | 23 (54.8)                              | 19 (45.2)                        |                               |            |
| <i>Adj. residuals</i>                                            | -0.8                                   | 0.8                              |                               |            |
| <b>Vaccination status<sup>b</sup></b>                            |                                        |                                  | 0.02                          | 0.15*      |
| Yes                                                              | 148 (63.5)                             | 85 (36.5)                        |                               |            |
| <i>Adj. residuals</i>                                            | 2.5                                    | -2.5                             |                               |            |
| No                                                               | 21 (43.8)                              | 27 (56.3)                        |                               |            |
| <i>Adj. residuals</i>                                            | -2.5                                   | 2.5                              |                               |            |
| <b>Vaccination intent<sup>c</sup></b>                            |                                        |                                  | 0.006                         | 0.19       |
| Likely                                                           | 158 (63.5)                             | 91 (36.5)                        |                               |            |
| <i>Adj. residuals</i>                                            | 3.2                                    | -3.2                             |                               |            |
| Unsure/Don't know                                                | 7 (38.9)                               | 11 (61.1)                        |                               |            |
| <i>Adj. residuals</i>                                            | -1.9                                   | 1.9                              |                               |            |
| Unlikely                                                         | 4 (28.6)                               | 10 (71.4)                        |                               |            |
| <i>Adj. residuals</i>                                            | -2.5                                   | 2.5                              |                               |            |
| <b>Belief about likelihood of COVID-19 infection<sup>d</sup></b> |                                        |                                  | 0.85                          | 0.03       |
| Likely                                                           | 85 (59.4)                              | 58 (40.6)                        |                               |            |
| <i>Adj. residuals</i>                                            | -0.2                                   | 0.2                              |                               |            |



|                                                   |            |           |      |      |
|---------------------------------------------------|------------|-----------|------|------|
| Unlikely                                          | 54 (59.3)  | 37 (40.7) |      |      |
| <i>Adj. residuals</i>                             | -0.2       | 0.2       |      |      |
| Don't know                                        | 30 (63.8)  | 17 (36.2) |      |      |
| <i>Adj. residuals</i>                             | 0.6        | -0.6      |      |      |
| <b>Multiple sclerosis (MS) type</b>               |            |           | 0.35 | 0.09 |
| Relapsing-remitting MS                            | 116 (57.1) | 87 (42.9) |      |      |
| <i>Adj. residuals</i>                             | -1.4       | 1.4       |      |      |
| Primary progressive MS                            | 18 (69.2)  | 8 (30.8)  |      |      |
| <i>Adj. residuals</i>                             | 1.1        | -1.1      |      |      |
| Secondary progressive MS                          | 20 (66.7)  | 10 (33.3) |      |      |
| <i>Adj. residuals</i>                             | 0.9        | -0.9      |      |      |
| <b>Time since MS diagnosis<sup>e</sup></b>        |            |           | 0.39 | 0.08 |
| <5 years                                          | 48 (54.5)  | 40 (45.5) |      |      |
| <i>Adj. residuals</i>                             | -1.3       | 1.3       |      |      |
| 5.1 – 10 years                                    | 35 (60.3)  | 23 (39.7) |      |      |
| <i>Adj. residuals</i>                             | 0.0        | 0.0       |      |      |
| > 10 years                                        | 86 (63.7)  | 49 (36.3) |      |      |
| <i>Adj. residuals</i>                             | 1.2        | -1.2      |      |      |
| <b>Current MS treatment</b>                       |            |           | 0.30 | 0.10 |
| Tablets                                           | 69 (65.1)  | 37 (34.9) |      |      |
| <i>Adj. residuals</i>                             | 1.5        | -1.5      |      |      |
| Injectables                                       | 15 (57.7)  | 11 (42.3) |      |      |
| <i>Adj. residuals</i>                             | -0.2       | 0.2       |      |      |
| Intravenous                                       | 50 (54.3)  | 42 (45.7) |      |      |
| <i>Adj. residuals</i>                             | -1.4       | 1.4       |      |      |
| <b>MS control over past 6 months</b>              |            |           | 0.65 | 0.06 |
| Yes                                               | 138 (61.1) | 88 (38.9) |      |      |
| <i>Adj. residuals</i>                             | 0.6        | -0.6      |      |      |
| No                                                | 14 (51.9)  | 13 (48.1) |      |      |
| <i>Adj. residuals</i>                             | -0.9       | 0.9       |      |      |
| Don't know                                        | 17 (60.7)  | 11 (39.3) |      |      |
| <i>Adj. residuals</i>                             | 0.1        | -0.1      |      |      |
| <b>MS affect daily activities in last 4 weeks</b> |            |           | 0.11 | 0.16 |
| All of the time                                   | 30 (68.2)  | 14 (31.8) |      |      |
| <i>Adj. residuals</i>                             | 1.2        | -1.2      |      |      |
| Most of the time                                  | 23 (65.7)  | 12 (34.3) |      |      |
| <i>Adj. residuals</i>                             | 0.7        | -0.7      |      |      |
| Some of the time                                  | 41 (48.2)  | 44 (51.8) |      |      |
| <i>Adj. residuals</i>                             | -2.7       | 2.7       |      |      |
| Not very often                                    | 33 (62.3)  | 20 (37.7) |      |      |
| <i>Adj. residuals</i>                             | 0.4        | -0.4      |      |      |
| Not at all                                        | 42 (65.6)  | 22 (34.4) |      |      |
| <i>Adj. residuals</i>                             | 1.0        | -1.0      |      |      |

\* Phi coefficient reported. Abbreviations: Adj. residuals, adjusted residuals; AUD, Australian Dollars; K, 1000; MS, multiple sclerosis. <sup>a</sup> Chi-square p-value. The variable 'No. of times missed disease-modifying therapies in the last month' was not analysed due to low frequencies in most of its categories. The following categories were not included in the analyses: Non-binary/prefer not to say (gender); other (highest level of education); don't know/other (MS type). <sup>b</sup> Vaccination status was defined as receiving at least one COVID-19 vaccine dose. <sup>c</sup> Vaccination intent were categorised as: Likely, Have/definitely/probably; Unsure, May or may not/possibly/don't know; Unlikely, Probably not/definitely not. <sup>d</sup> Belief about likelihood of contracting COVID-19 within the next 12 months were categorised as: Likely, Definitely/probably/possibly; Unlikely, Probably not/Definitely Not; Don't know, Don't know. <sup>e</sup> The '<1 year' and '1 – 5 years' categories were combined for analysis.
